# Supplementary material
Source: Springer Nature journal article supplement (https://www.springermedizin.de/resource/supplementary/13058_2004_1024_MOESM3_ESM.pdf/9698166)

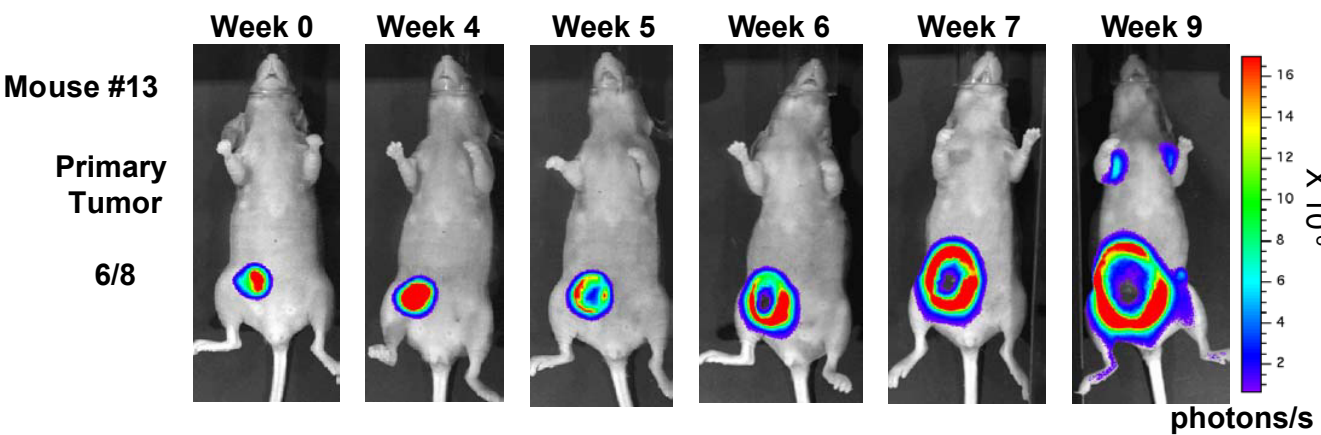

**Spontaneous Metastasis to Lymph Nodes**

**6/6**

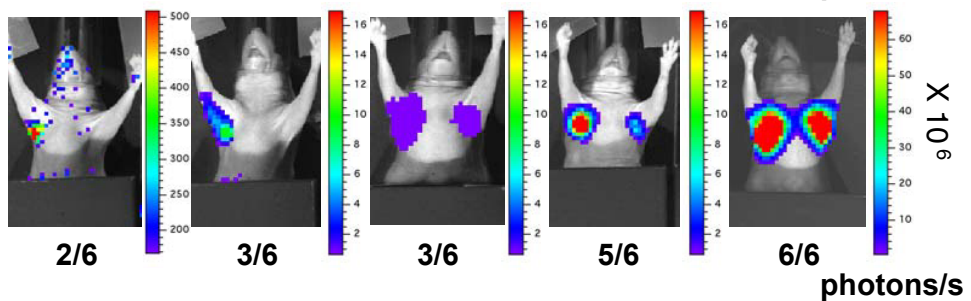

**Ex Vivo – week 9**

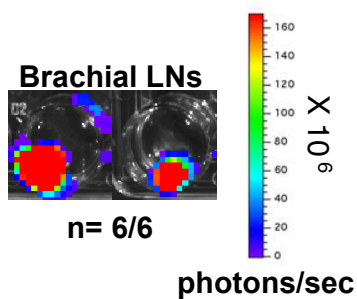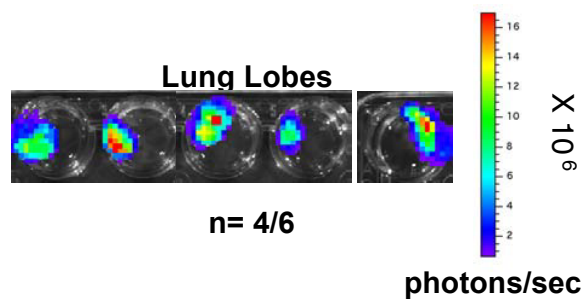

**Histology**

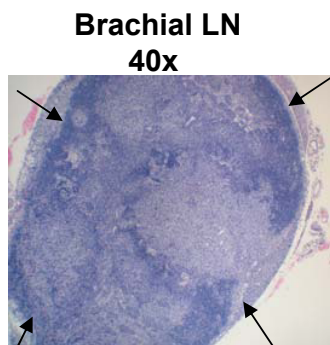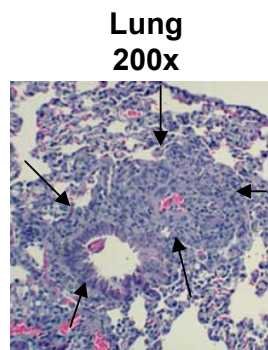

Supplement: MOESM3 [file 9698166]
